# Supplementary material for: Renin-angiotensin-aldosterone system activation in long-standing type 1 diabetes
Source: JCI journal article supplement (doi:10.1172/jci.insight.96968), 2018-01-10
Supplement: sd1 [file 1]

## SUPPLEMENTAL DATA

### Supplemental Figure 1. Study design and experimental protocol

#### A) Study Design

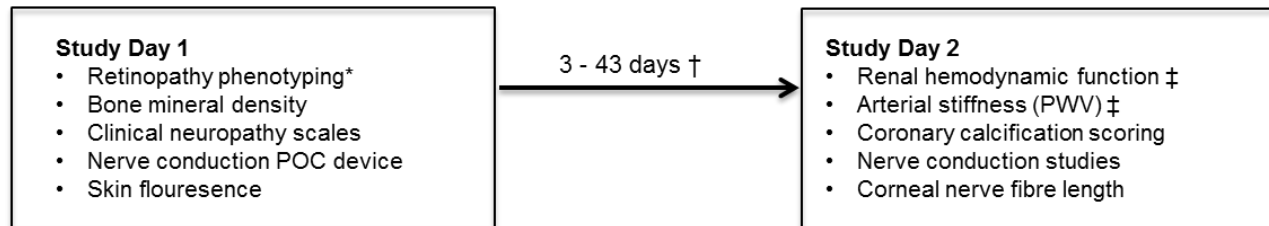

#### B) Experimental Protocol

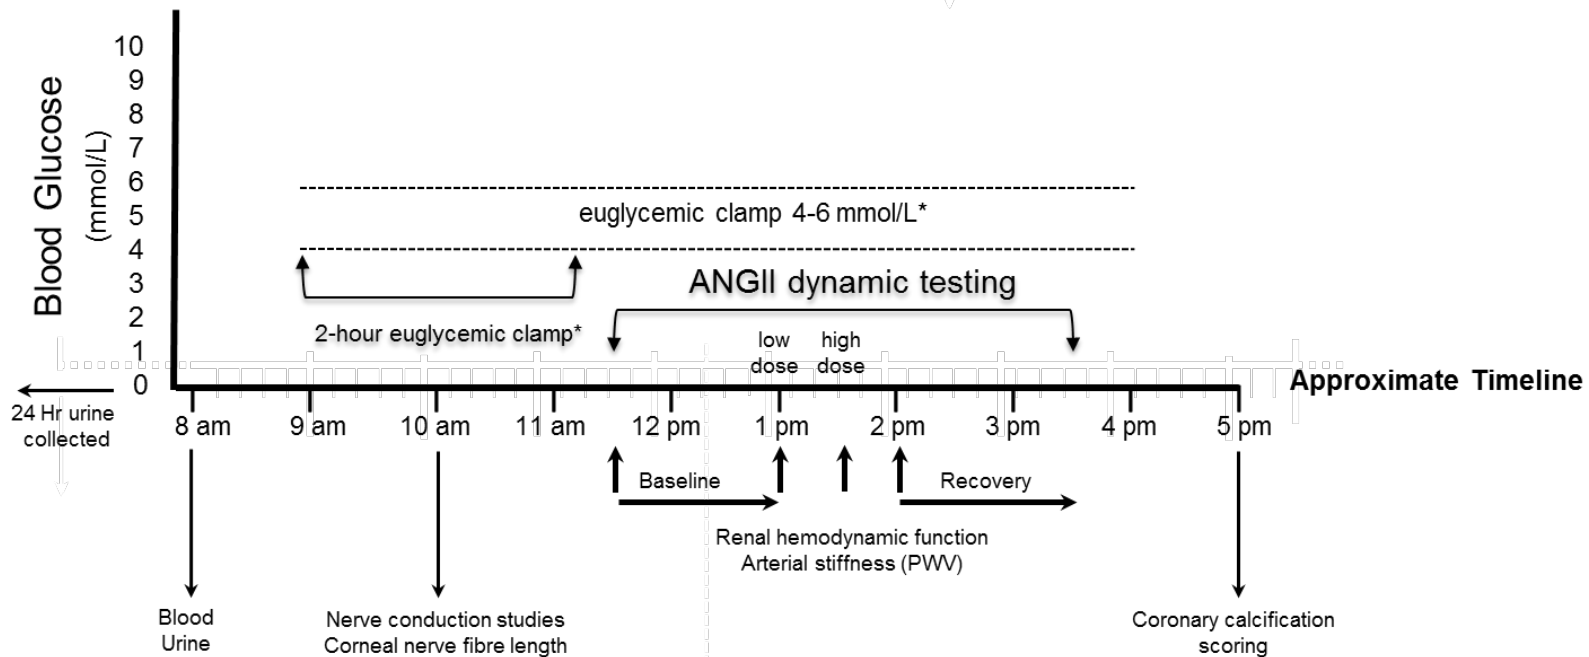

Legend: \*Type 1 diabetes only. † RAASi withdrawal. ‡ At baseline and during ANGII

ANGII, angiotensin II; POC, point of care; PWV, pulse wave velocity; RAASi, renin-angiotensin-aldosterone system inhibitor.

**Supplemental Table 1. Heart rate variability correlations in DKD resistors (A) and DKD (B) in type 1 diabetes in response to exogenous RAAS stimulation with ANGII**

(A) DKD resistors

|              | $\Delta$ RVR in response to low dose ANG II | $\Delta$ RVR in response to high dose ANGII | $\Delta$ SBP in response to low dose ANGII | $\Delta$ SBP in response to high dose ANGII |
|--------------|---------------------------------------------|---------------------------------------------|--------------------------------------------|---------------------------------------------|
| RMSSD*       | <b>r=0.41, p=0.009</b>                      | <b>r=0.36, p=0.021</b>                      | r=0.28, p=0.075                            | r=0.14, p=0.39                              |
| SDNN*        | r=0.31, p=0.051                             | r=0.27, p=0.10                              | r=0.23, p=0.14                             | r=0.08, p=0.63                              |
| SDNN/RMSSD   | <b>r=-0.40, p=0.010</b>                     | <b>r=-0.40, p=0.012</b>                     | r=-0.19, p=0.22                            | r=-0.12, p=0.46                             |
| LF/HF Ratio* | <b>r=-0.40, p=0.012</b>                     | <b>r=-0.48, p=0.002</b>                     | r=-0.07, p=0.65                            | r=-0.22, p=0.16                             |

\* Natural log-transformed

(B) DKD

|              | $\Delta$ RVR in response to low dose ANG II | $\Delta$ RVR in response to high dose ANG II | $\Delta$ SBP in response to low dose ANGII | $\Delta$ SBP in response to high dose ANG II |
|--------------|---------------------------------------------|----------------------------------------------|--------------------------------------------|----------------------------------------------|
| RMSSD*       | r=0.17, p=0.50                              | r=-0.03, p=0.89                              | <b>r=0.47, p=0.035</b>                     | r=0.14, p=0.57                               |
| SDNN*        | r=0.04, p=0.86                              | r=-0.25, p=0.31                              | r=0.29, p=0.22                             | r=-0.04, p=0.88                              |
| SDNN/RMSSD   | r=-0.26, p=0.27                             | r=-0.15, p=0.55                              | r=-0.43, p=0.053                           | r=-0.24, p=0.33                              |
| LF/HF Ratio* | r=-0.29, p=0.22                             | r=-0.34, p=0.16                              | r=-0.43, p=0.060                           | r=-0.29, p=0.23                              |

\* Natural log-transformed

DKD, diabetic kidney disease; ANGII, angiotensin II; HF, high frequency; LF, low frequency; RMSSD, root mean square successive difference; SDNN, sympathetic activity, standard deviation of normal-to-normal interval; RVR, renal vascular resistance.
